# Supplementary material for: Influence of deep learning image reconstruction and adaptive statistical iterative reconstruction-V on coronary artery calcium quantification
Source: PubMed Central journal article supplement — Ann Transl Med. 2021 Dec;9(23):1726. doi: 10.21037/atm-21-5548 (PMC8743730; doi:10.21037/atm-21-5548), 2021-12
Supplement: atm-09-23-1726-rc.pdf [file atm-09-23-1726-rc.pdf]

## **Materials Design Analysis Reporting (MDAR) Checklist for Authors**

The MDAR framework establishes a minimum set of requirements in transparent reporting applicable to studies in the life sciences (see Statement of Task: [doi:10.31222/osf.io/9sm4x](https://doi.org/10.31222/osf.io/9sm4x)). The MDAR checklist is a tool for authors, editors and others seeking to adopt the MDAR framework for transparent reporting in manuscripts and other outputs. Please refer to the MDAR Elaboration Document for additional context for the MDAR framework.

**Materials**

|                                                                                                                                                                                                         |                                      |                                                                 |
|---------------------------------------------------------------------------------------------------------------------------------------------------------------------------------------------------------|--------------------------------------|-----------------------------------------------------------------|
| <b>Antibodies</b>                                                                                                                                                                                       | <b>Yes (indicate where provided:</b> | <b>n/a</b>                                                      |
| For commercial reagents, provide supplier name, catalogue number and RRID, if available.                                                                                                                |                                      | <b>n/a</b><br>(Our study does not involve antibodies)           |
| <b>Cell materials</b>                                                                                                                                                                                   | <b>Yes (indicate where provided:</b> | <b>n/a</b>                                                      |
| <b>Cell lines:</b> Provide species information, strain. Provide accession number in repository <b>OR</b> supplier name, catalog number, clone number, <b>OR</b> RRID                                    |                                      | <b>n/a</b><br>(Our study does not involve Cell materials)       |
| <b>Primary cultures:</b> Provide species, strain, sex of origin, genetic modification status.                                                                                                           |                                      | <b>n/a</b><br>(Our study does not involve Cell materials)       |
| <b>Experimental animals</b>                                                                                                                                                                             | <b>Yes (indicate where provided:</b> | <b>n/a</b>                                                      |
| <b>Laboratory animals:</b> Provide species, strain, sex, age, genetic modification status. Provide accession number in repository <b>OR</b> supplier name, catalog number, clone number, <b>OR</b> RRID |                                      | <b>n/a</b><br>(Our study does not involve Experimental animals) |
| <b>Animal observed in or captured from the field:</b> Provide species, sex and age where possible                                                                                                       |                                      | <b>n/a</b><br>(Our study does not involve Experimental animals) |
| <b>Model organisms:</b> Provide Accession number in repository (where relevant) <b>OR</b> RRID                                                                                                          |                                      | <b>n/a</b><br>(Our study does not involve Experimental animals) |
| <b>Plants and microbes</b>                                                                                                                                                                              | <b>Yes (indicate where provided:</b> | <b>n/a</b>                                                      |
| <b>Plants:</b> provide species and strain, unique accession number if available, and source (including location for collected wild specimens)                                                           |                                      | <b>n/a</b><br>(Our study does not involve Plants)               |
| <b>Microbes:</b> provide species and strain, unique accession number if available, and source                                                                                                           |                                      | <b>n/a</b><br>(Our study does not involve Microbes)             |
| <b>Human research participants</b>                                                                                                                                                                      | <b>Yes (indicate where provided:</b> | <b>n/a</b>                                                      |
| Identify authority granting ethics approval (IRB or equivalent committee(s), provide reference number for approval.                                                                                     | Methods/Para 1                       |                                                                 |
| Provide statement confirming informed consent obtained from study participants.                                                                                                                         | Methods/Para 1                       |                                                                 |
| Report on age and sex for all study participants.                                                                                                                                                       | Results/Para 1                       |                                                                 |

**Design**

|                                                                                                                                                        |                                                         |                                                                                                                                                       |
|--------------------------------------------------------------------------------------------------------------------------------------------------------|---------------------------------------------------------|-------------------------------------------------------------------------------------------------------------------------------------------------------|
| <b>Study protocol</b>                                                                                                                                  | <b>Yes (indicate where provided: section/paragraph)</b> | <b>n/a</b>                                                                                                                                            |
| For clinical trials, provide the trial registration number <b>OR</b> cite DOI in manuscript.                                                           |                                                         | <b>n/a</b><br>(we have registered in Registration and Filing Information System for Medical Research, but we have not obtained a registration number) |
| <b>Laboratory protocol</b>                                                                                                                             | <b>Yes (indicate where provided: section/paragraph)</b> | <b>n/a</b>                                                                                                                                            |
| Provide DOI or other citation details if detailed step-by-step protocols are available.                                                                |                                                         | <b>n/a</b><br>(we have no detailed step-by-step protocols)                                                                                            |
| <b>Experimental study design (statistics)</b>                                                                                                          | <b>Yes (indicate where provided: section/paragraph)</b> | <b>n/a</b>                                                                                                                                            |
| State whether and how the following have been done, <b>or</b> if they were not                                                                         |                                                         |                                                                                                                                                       |
| Sample size determination                                                                                                                              |                                                         | <b>n/a</b><br>(Due to the equipment, we only include a limited number of patients.)                                                                   |
| Randomisation                                                                                                                                          | Methods/Para 1                                          |                                                                                                                                                       |
| Blinding                                                                                                                                               | Methods/Para 1                                          |                                                                                                                                                       |
| Inclusion/exclusion criteria                                                                                                                           | Methods/Para 1                                          |                                                                                                                                                       |
| <b>Sample definition and in-laboratory</b>                                                                                                             | <b>Yes (indicate where provided: section/paragraph)</b> | <b>n/a</b>                                                                                                                                            |
| State number of times the experiment was replicated in laboratory                                                                                      | Methods/Para 6                                          |                                                                                                                                                       |
| Define whether data describe technical or biological replicates                                                                                        | Methods/Para 6                                          |                                                                                                                                                       |
| <b>Ethics</b>                                                                                                                                          | <b>Yes (indicate where provided: section/paragraph)</b> | <b>n/a</b>                                                                                                                                            |
| Studies involving human participants: State details of authority granting ethics approval (IRB or equivalent committee(s), provide reference           | Methods/Para 1                                          |                                                                                                                                                       |
| Studies involving experimental animals: State details of authority granting ethics approval (IRB or equivalent committee(s), provide reference         |                                                         | <b>n/a</b><br>(Our study does not involve experimental animals)                                                                                       |
| Studies involving specimen and field samples: State if relevant permits obtained, provide details of authority approving study; if none were required, |                                                         | <b>n/a</b><br>(Our study does not involve specimen and field samples)                                                                                 |
| <b>Dual Use Research of Concern (DURC)</b>                                                                                                             | <b>Yes (indicate where provided: section/paragraph)</b> | <b>n/a</b>                                                                                                                                            |
| If study is subject to dual use research of concern, state the authority granting approval and reference number for the regulatory approval            |                                                         | <b>n/a</b><br>our study not subject to dual use research of concern                                                                                   |

**Analysis**

|                                                                                                                                      |                                                         |                                                                              |
|--------------------------------------------------------------------------------------------------------------------------------------|---------------------------------------------------------|------------------------------------------------------------------------------|
| <b>Attrition</b>                                                                                                                     | <b>Yes (indicate where provided: section/paragraph)</b> | <b>n/a</b>                                                                   |
| State if sample or data point from the analysis is excluded, and whether the criteria for exclusion were determined and specified in | Methods/Para 1                                          |                                                                              |
| <b>Statistics</b>                                                                                                                    | <b>Yes (indicate where provided: section/paragraph)</b> | <b>n/a</b>                                                                   |
| Describe statistical tests used and justify choice of tests.                                                                         | Methods/Para 9                                          |                                                                              |
| <b>Data Availability</b>                                                                                                             | <b>Yes (indicate where provided: section/paragraph)</b> | <b>n/a</b>                                                                   |
| State whether newly created datasets are available, including protocols for access or restriction on access.                         | Data Sharing Statement.                                 |                                                                              |
| If data are publicly available, provide accession number in repository or DOI or URL.                                                | Data Sharing Statement.                                 |                                                                              |
| If publicly available data are reused, provide accession number in repository or DOI or URL, where possible.                         | Data Sharing Statement.                                 |                                                                              |
| <b>Code Availability</b>                                                                                                             | <b>Yes (indicate where provided: section/paragraph)</b> | <b>n/a</b>                                                                   |
| For all newly generated code and software essential for replicating the main findings of the study:                                  |                                                         |                                                                              |
| State whether the code or software is available.                                                                                     |                                                         | <b>n/a</b><br>(Our study does not involve newly generated code and software) |
| If code is publicly available, provide accession number in repository, or DOI or URL.                                                |                                                         | <b>n/a</b><br>(Our study does not involve newly generated code and software) |

**Reporting**

|                                                                                                                                                                                                                                          |                                                                                               |            |
|------------------------------------------------------------------------------------------------------------------------------------------------------------------------------------------------------------------------------------------|-----------------------------------------------------------------------------------------------|------------|
| <b>Adherence to community standards</b>                                                                                                                                                                                                  | <b>Yes (indicate where provided: section/paragraph)</b>                                       | <b>n/a</b> |
| MDAR framework recommends adoption of discipline-specific guidelines, established and endorsed through community initiatives. Journals have their own policy about requiring specific guidelines and recommendations to complement MDAR. |                                                                                               |            |
| State if relevant guidelines (eg., ICMJE, MIBBI, ARRIVE) have been followed, and whether a checklist (eg., CONSORT, PRISMA, ARRIVE) is provided with the manuscript.                                                                     | ICMJE guidelines were followed, as the journal follows ICMJE recommendations for publication. |            |

Article information: <https://dx.doi.org/10.21037/atm-21-5548>
