# Supplementary material for: Influence of deep learning image reconstruction and adaptive statistical iterative reconstruction-V on coronary artery calcium quantification
Source: PubMed Central journal article supplement — Ann Transl Med. 2021 Dec;9(23):1726. doi: 10.21037/atm-21-5548 (PMC8743730; doi:10.21037/atm-21-5548), 2021-12
Supplement: atm-09-23-1726-supplementary.pdf [file atm-09-23-1726-supplementary.pdf]

**Table S1** Quantitative image analysis of CT value, image noise, and SNR for five reconstruction groups

| Reconstruction | Quantitative image quality metrics |               |                             |                |               |                             |
|----------------|------------------------------------|---------------|-----------------------------|----------------|---------------|-----------------------------|
|                | Signal AR (HU)                     | Noise AR (HU) | Signal-to-noise ratio in AR | Signal LV (HU) | Noise LV (HU) | Signal-to-noise ratio in LV |
| FBP            | 50.8±8.7                           | 22.9±4.6      | 2.3±0.5                     | 48.4±8.3       | 24.7±4.8      | 2.0±0.6                     |
| ASIR-V 50%     | 50.7±8.5                           | 16.8±3.6      | 3.1±0.7                     | 48.3±8.3       | 18.3±3.9      | 2.8±0.8                     |
| DLIR-L         | 50.8±8.7                           | 16.5±3.8      | 3.2±0.8                     | 48.2±8.4       | 18.9±4.9      | 2.7±0.9                     |
| DLIR-M         | 50.7±8.6                           | 14.2±2.7      | 3.7±0.8                     | 48.2±8.4       | 16.1±3.7      | 3.2±1.0                     |
| DLIR-H         | 50.7±8.5                           | 12.3±2.6      | 4.3±1.1                     | 48.1±8.5       | 13.6±3.2      | 3.7±1.2                     |

Data given is mean ± SD. AR, aorta root; LV, left ventricular cavity; FBP, filtered back projection; ASIR-V 50%, adaptive statistical iterative reconstruction-V at 50% intensity; DLIR-L, deep learning image reconstruction at low level; DLIR-M, deep learning image reconstruction at medium level; DLIR-H, deep learning image reconstruction at high level; HU, Hounsfield units.
